# Supplementary material for: Pushing the limits in accurate vibrational structure calculations: anharmonic frequencies of lithium fluoride clusters (LiF)n, n = 2–10
Source: Royal Society of Chemistry journal article supplement (doi:10.1039/c4cp02264e), 2014-06-26
Supplement: c4cp02264e1.pdf [file c4cp02264e1.pdf]

## Supplementary Material

# Pushing the limits in accurate vibrational structure calculations: Anharmonic frequencies of lithium fluoride clusters $(\text{LiF})_n$ , $n=2-10$

Dominik Oschetzki and Guntram Rauhut\*

**Table 1** Anharmonic frequencies in  $\text{cm}^{-1}$  and IR intensities in  $\text{km/mol}$  for  $\text{Li}_4\text{F}_4(\text{a})$  at the VCI level.

| Mode | Sym.  | Freq.  | Int.   | Mode | Sym.  | Freq. | Int.   | Mode | Sym.  | Freq. | Int. | Mode | Sym.  | Freq. | Int. |
|------|-------|--------|--------|------|-------|-------|--------|------|-------|-------|------|------|-------|-------|------|
| ZPVE | $A_1$ | 3774.2 |        | 6    | $T_2$ | 470.5 | 3796.7 | 4    | $T_1$ | 375.2 | 0.0  | 2    | $T_2$ | 270.0 | 67.5 |
| 8    | $A_1$ | 575.6  | 43.8   | 5    | $E$   | 429.3 | 3.2    | 3    | $A_1$ | 388.0 | 68.2 | 1    | $E$   | 253.0 | 0.1  |
| 7    | $T_2$ | 541.5  | 3389.7 |      |       |       |        |      |       |       |      |      |       |       |      |

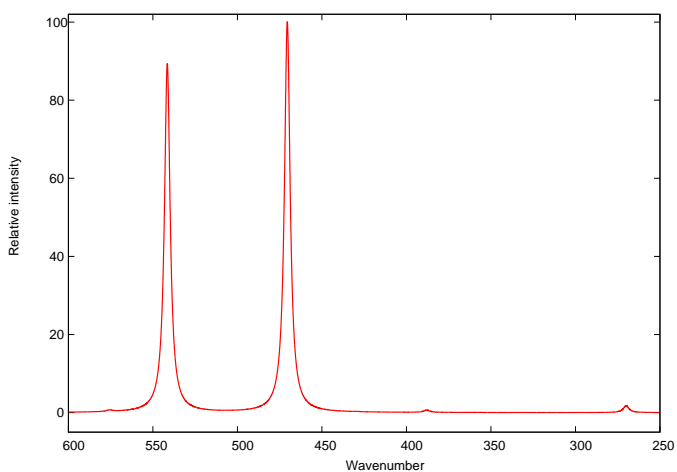

**Fig. 1** Simulated IR spectra of  $\text{Li}_4\text{F}_4(\text{a})$  at the VCI level.

**Table 2** Anharmonic frequencies in  $\text{cm}^{-1}$  and IR intensities in  $\text{km/mol}$  for  $\text{Li}_4\text{F}_4(\text{b})$  at the VCI level.

| Mode | Sym.     | Freq.  | Int.   | Mode | Sym.     | Freq. | Int.   | Mode | Sym.     | Freq. | Int.   | Mode | Sym.     | Freq. | Int. |
|------|----------|--------|--------|------|----------|-------|--------|------|----------|-------|--------|------|----------|-------|------|
| ZPVE | $A_{1g}$ | 3267.5 |        | 11   | $B_{1g}$ | 500.3 | 0.0    | 7    | $A_{1g}$ | 259.9 | 1.5    | 3    | $B_{1g}$ | 102.3 | 0.0  |
| 14   | $E_u$    | 768.9  | 3245.3 | 10   | $E_u$    | 420.3 | 985.8  | 6    | $E_g$    | 187.5 | 0.0    | 2    | $B_{1u}$ | 55.4  | 0.0  |
| 13   | $A_{2g}$ | 757.8  | 0.0    | 9    | $A_{1g}$ | 396.6 | 202.5  | 5    | $E_u$    | 184.9 | 2066.2 | 1    | $B_{2g}$ | 53.4  | 0.5  |
| 12   | $B_{2g}$ | 744.9  | 9.0    | 8    | $A_{2u}$ | 266.3 | 6859.5 | 4    | $B_{2u}$ | 120.6 | 0.0    |      |          |       |      |

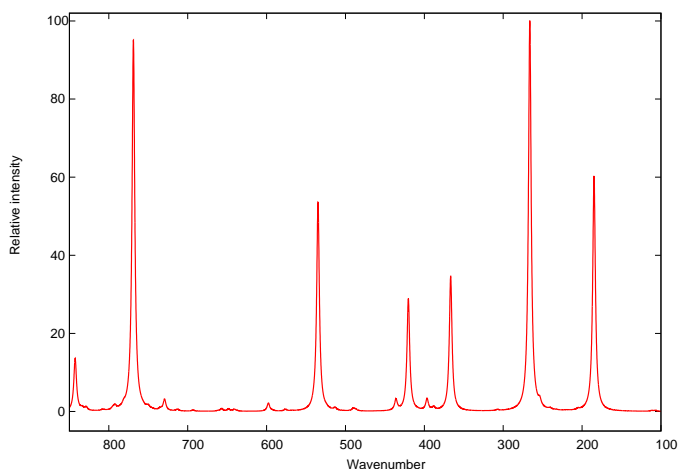

**Fig. 2** Simulated IR spectra of  $\text{Li}_4\text{F}_4(\text{b})$  at the VCI level.

**Table 3** Anharmonic frequencies in  $\text{cm}^{-1}$  and IR intensities in  $\text{km/mol}$  for  $\text{Li}_4\text{F}_4(\text{c})$  at the VCI level.

| Mode | Sym.  | Freq.  | Int.  | Mode | Sym.  | Freq. | Int.  | Mode | Sym.  | Freq. | Int.  | Mode | Sym.  | Freq. | Int. |
|------|-------|--------|-------|------|-------|-------|-------|------|-------|-------|-------|------|-------|-------|------|
| ZPVE | $A_g$ | 3383.6 |       | 14   | $A_g$ | 592.7 | 10.4  | 9    | $A_g$ | 293.9 | 1.6   | 4    | $B_u$ | 175.7 | 10.8 |
| 18   | $B_u$ | 725.7  | 196.8 | 13   | $B_u$ | 602.0 | 57.3  | 8    | $B_u$ | 257.9 | 113.6 | 3    | $A_u$ | 121.5 | 38.6 |
| 17   | $A_g$ | 714.4  | 0.2   | 12   | $B_u$ | 367.7 | 46.6  | 7    | $A_g$ | 252.6 | 4.7   | 2    | $B_g$ | 110.3 | 0.5  |
| 16   | $B_u$ | 654.7  | 223.6 | 11   | $A_g$ | 335.5 | 0.2   | 6    | $B_g$ | 240.8 | 0.0   | 1    | $A_u$ | 38.9  | 0.1  |
| 15   | $A_g$ | 652.4  | 21.0  | 10   | $A_u$ | 323.4 | 417.0 | 5    | $A_g$ | 147.6 | 0.3   |      |       |       |      |

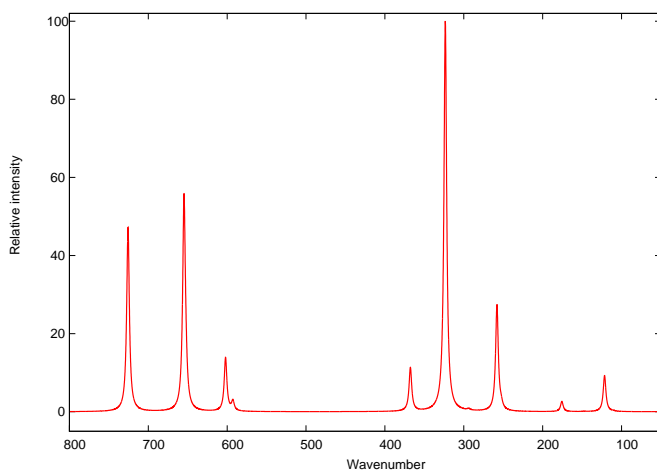

**Fig. 3** Simulated IR spectra of  $\text{Li}_4\text{F}_4(\text{c})$  at the VCI level.

**Table 4** Anharmonic frequencies in  $\text{cm}^{-1}$  and IR intensities in  $\text{km/mol}$  for  $\text{Li}_4\text{F}_4(\text{d})$  at the VCI level.

| Mode | Sym.  | Freq.  | Int. | Mode | Sym.  | Freq. | Int.  | Mode | Sym.  | Freq. | Int. | Mode | Sym.  | Freq. | Int. |
|------|-------|--------|------|------|-------|-------|-------|------|-------|-------|------|------|-------|-------|------|
| ZPVE | $A_1$ | 3344.2 |      | 14   | $A_1$ | 543.4 | 7.8   | 9    | $B_1$ | 319.6 | 86.4 | 4    | $A_2$ | 181.8 | 0.0  |
| 18   | $A_1$ | 742.1  | 43.0 | 13   | $B_2$ | 524.7 | 109.9 | 8    | $A_1$ | 317.9 | 7.1  | 3    | $A_2$ | 136.6 | 0.0  |
| 17   | $B_2$ | 722.0  | 17.8 | 12   | $A_1$ | 509.2 | 28.5  | 7    | $B_1$ | 268.1 | 93.4 | 2    | $B_2$ | 105.0 | 31.6 |
| 16   | $A_1$ | 701.5  | 36.9 | 11   | $B_2$ | 335.8 | 69.0  | 6    | $B_2$ | 215.3 | 54.1 | 1    | $B_1$ | 79.1  | 11.4 |
| 15   | $B_1$ | 566.4  | 59.4 | 10   | $A_1$ | 338.7 | 12.4  | 5    | $A_1$ | 205.6 | 13.2 |      |       |       |      |

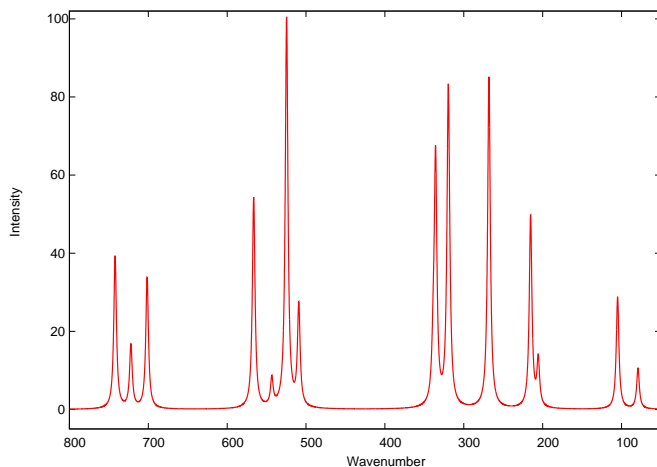

**Fig. 4** Simulated IR spectra of  $\text{Li}_4\text{F}_4(\text{d})$  at the VCI level.

**Table 5** Anharmonic frequencies in  $\text{cm}^{-1}$  and IR intensities in  $\text{km/mol}$  for  $\text{Li}_4\text{F}_4(\text{e})$  at the VCI level.

| Mode | Sym. | Freq.  | Int.  | Mode | Sym. | Freq. | Int.  | Mode | Sym. | Freq. | Int.  | Mode | Sym. | Freq. | Int. |
|------|------|--------|-------|------|------|-------|-------|------|------|-------|-------|------|------|-------|------|
| ZPVE | A1   | 3373.8 |       | 14   | B1   | 586.5 | 142.2 | 9    | B1   | 289.7 | 136.7 | 4    | A2   | 129.1 | 0.0  |
| 18   | B2   | 710.3  | 89.5  | 13   | A1   | 540.1 | 66.8  | 8    | A1   | 273.9 | 7.3   | 3    | A2   | 96.0  | 0.0  |
| 17   | A1   | 699.9  | 13.6  | 12   | A1   | 444.4 | 2.5   | 7    | B2   | 225.8 | 4.7   | 2    | B2   | 84.3  | 19.0 |
| 16   | B2   | 650.0  | 1.9   | 11   | A1   | 379.7 | 14.1  | 6    | B1   | 200.0 | 34.4  | 1    | B1   | 91.2  | 15.4 |
| 15   | A1   | 615.6  | 115.3 | 10   | B2   | 314.2 | 80.4  | 5    | A1   | 200.5 | 15.3  |      |      |       |      |

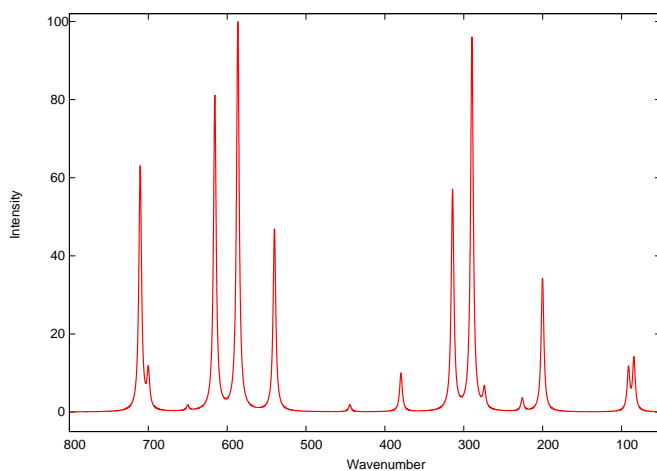

**Fig. 5** Simulated IR spectra of  $\text{Li}_4\text{F}_4(\text{e})$  at the VCI level.

**Table 6** Anharmonic frequencies in  $\text{cm}^{-1}$  and IR intensities in  $\text{km/mol}$  for  $\text{Li}_5\text{F}_5$  at the VCI level.

| Mode | Sym. | Freq.  | Int.  | Mode | Sym. | Freq. | Int.  | Mode | Sym. | Freq. | Int.  | Mode | Sym. | Freq. | Int. |
|------|------|--------|-------|------|------|-------|-------|------|------|-------|-------|------|------|-------|------|
| ZPVE | A1   | 4357.6 |       | 18   | A1   | 532.3 | 28.8  | 12   | A1   | 296.7 | 14.8  | 6    | A1   | 138.0 | 35.8 |
| 24   | B1   | 714.2  | 157.1 | 17   | A1   | 516.3 | 18.4  | 11   | A2   | 254.0 | 0.0   | 5    | B2   | 130.8 | 13.8 |
| 23   | A1   | 708.4  | 151.8 | 16   | A1   | 446.6 | 1.8   | 10   | B1   | 236.5 | 107.4 | 4    | B1   | 123.6 | 15.8 |
| 22   | B2   | 684.8  | 72.5  | 15   | B2   | 400.7 | 211.9 | 9    | A1   | 223.1 | 4.6   | 3    | A2   | 112.6 | 0.0  |
| 21   | A1   | 671.1  | 125.0 | 14   | B1   | 360.1 | 246.5 | 8    | B2   | 209.1 | 132.8 | 2    | B2   | 72.9  | 12.0 |
| 20   | B1   | 620.1  | 2.6   | 13   | A1   | 319.9 | 1.1   | 7    | A2   | 193.0 | 0.0   | 1    | B1   | 46.2  | 7.3  |
| 19   | B2   | 509.2  | 123.5 |      |      |       |       |      |      |       |       |      |      |       |      |

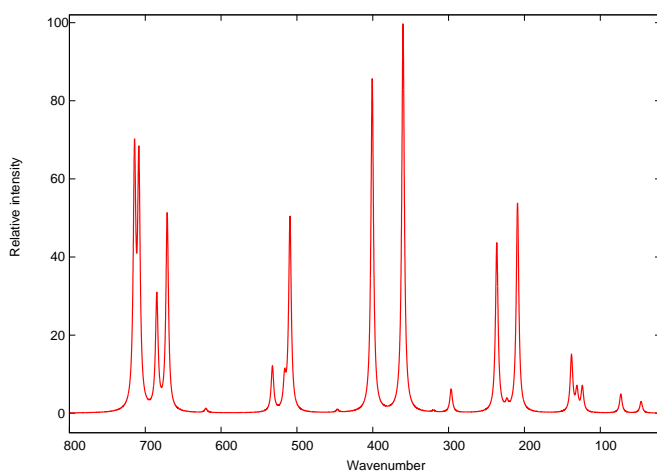

**Fig. 6** Simulated IR spectra of  $\text{Li}_5\text{F}_5$  at the VCI level.

**Table 7** Anharmonic frequencies in  $\text{cm}^{-1}$  and IR intensities in  $\text{km/mol}$  for  $\text{Li}_6\text{F}_6$  at the VCI level.

| Mode | Sym.     | Freq.  | Int.    | Mode | Sym.     | Freq. | Int.   | Mode | Sym.     | Freq. | Int.   |
|------|----------|--------|---------|------|----------|-------|--------|------|----------|-------|--------|
| ZPVE | $A_{1g}$ | 5785.8 |         | 15   | $E_g$    | 437.4 | 0.0    | 7    | $A_{1u}$ | 264.1 | 42.2   |
| 22   | $E_u$    | 621.9  | 48583.8 | 14   | $A_{1g}$ | 383.5 | 0.0    | 6    | $A_{1g}$ | 241.8 | 0.0    |
| 21   | $E_g$    | 602.1  | 0.0     | 13   | $E_g$    | 384.3 | 0.0    | 5    | $E_g$    | 235.1 | 0.0    |
| 20   | $A_{1u}$ | 579.1  | 16.0    | 12   | $A_{1u}$ | 365.0 | 178.7  | 3    | $A_{2u}$ | 207.7 | 23.1   |
| 19   | $A_{2g}$ | 543.0  | 0.0     | 11   | $A_{2u}$ | 376.5 | 96.3   | 2    | $E_u$    | 157.6 | 1627.0 |
| 18   | $A_{1g}$ | 504.5  | 0.0     | 10   | $A_{2u}$ | 366.8 | 335.0  | 1    | $E_g$    | 106.0 | 0.0    |
| 17   | $A_{2u}$ | 487.9  | 737.4   | 9    | $A_{1g}$ | 339.2 | 0.0    |      |          |       |        |
| 16   | $E_u$    | 455.4  | 16027.4 | 8    | $E_u$    | 300.2 | 3622.1 |      |          |       |        |

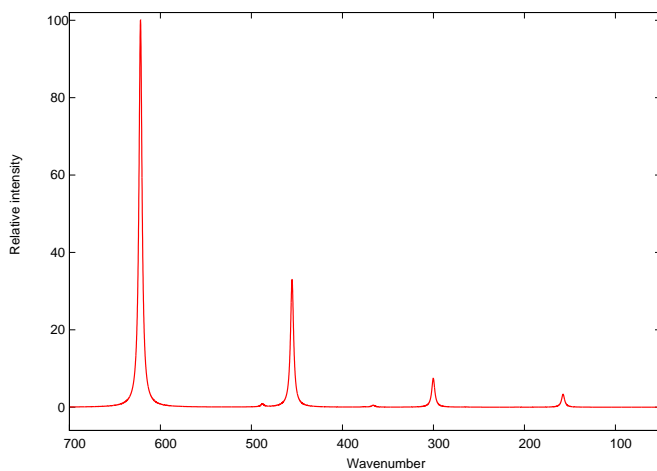

**Fig. 7** Simulated IR spectra of  $\text{Li}_6\text{F}_6$  at the VCI level.

**Table 8** Anharmonic frequencies in  $cm^{-1}$  and IR intensities in  $km/mol$  for  $Li_7F_7$  at the VCI level.

| Mode | Sym. | Freq.  | Int.  | Mode | Sym. | Freq. | Int.  | Mode | Sym. | Freq. | Int.  | Mode | Sym. | Freq. | Int.  |
|------|------|--------|-------|------|------|-------|-------|------|------|-------|-------|------|------|-------|-------|
| ZPVE | A'   | 6664.0 |       | 27   | A''  | 473.2 | 109.1 | 18   | A''  | 367.0 | 33.7  | 9    | A''  | 184.4 | 6.3   |
| 36   | A'   | 729.3  | 52.1  | 26   | A'   | 483.0 | 221.7 | 17   | A'   | 360.2 | 78.5  | 8    | A'   | 180.9 | 4.8   |
| 35   | A'   | 622.1  | 147.1 | 25   | A''  | 448.6 | 76.2  | 16   | A'   | 329.3 | 36.1  | 7    | A'   | 160.3 | 111.4 |
| 34   | A'   | 608.2  | 68.4  | 24   | A'   | 441.1 | 12.8  | 15   | A''  | 298.5 | 128.7 | 6    | A''  | 150.1 | 56.0  |
| 33   | A''  | 593.6  | 140.2 | 23   | A''  | 405.3 | 0.0   | 14   | A'   | 288.6 | 4.0   | 5    | A''  | 133.4 | 1.5   |
| 32   | A''  | 585.7  | 0.3   | 22   | A'   | 414.7 | 99.0  | 13   | A'   | 270.6 | 14.7  | 4    | A'   | 129.1 | 3.8   |
| 31   | A'   | 576.9  | 18.9  | 21   | A'   | 387.6 | 34.4  | 12   | A''  | 261.1 | 0.2   | 3    | A''  | 99.4  | 14.3  |
| 30   | A''  | 544.3  | 14.7  | 20   | A''  | 377.8 | 62.2  | 11   | A'   | 228.8 | 19.6  | 2    | A'   | 98.5  | 17.7  |
| 29   | A'   | 496.5  | 185.3 | 19   | A'   | 379.5 | 24.7  | 10   | A'   | 213.1 | 8.0   | 1    | A''  | 72.2  | 0.5   |
| 28   | A'   | 510.1  | 7.5   |      |      |       |       |      |      |       |       |      |      |       |       |

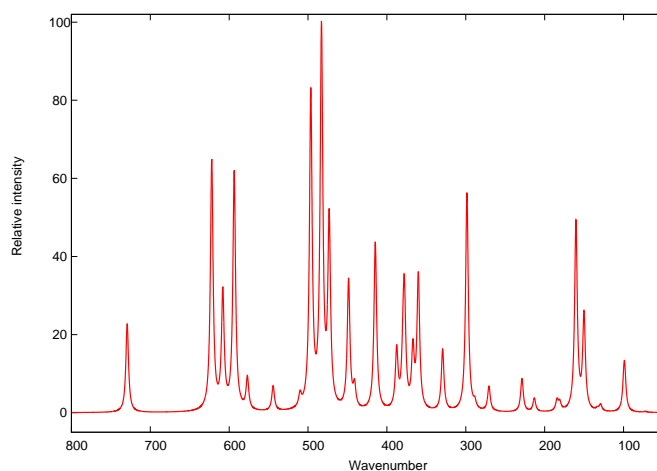**Fig. 8** Simulated IR spectra of  $Li_7F_7$  at the VCI level.**Table 9** Anharmonic frequencies in  $cm^{-1}$  and IR intensities in  $km/mol$  for  $Li_8F_8$  at the VCI level.

| Mode | Sym. | Freq.  | Int.  | Mode | Sym. | Freq. | Int.  | Mode | Sym. | Freq. | Int. | Mode | Sym. | Freq. | Int. |
|------|------|--------|-------|------|------|-------|-------|------|------|-------|------|------|------|-------|------|
| ZPVE | A    | 7817.6 |       | 24   | B    | 480.0 | 383.3 | 16   | B    | 389.2 | 38.1 | 8    | B    | 214.1 | 13.3 |
| 32   | B    | 657.7  | 510.1 | 23   | B    | 457.7 | 4.8   | 15   | E    | 361.9 | 91.5 | 7    | B    | 187.7 | 8.1  |
| 31   | E    | 639.1  | 76.3  | 22   | A    | 436.3 | 0.0   | 14   | B    | 340.9 | 70.2 | 6    | A    | 174.8 | 0.0  |
| 30   | A    | 609.2  | 0.0   | 21   | E    | 441.8 | 69.6  | 13   | A    | 310.4 | 0.0  | 5    | E    | 149.6 | 31.8 |
| 29   | B    | 604.1  | 66.9  | 20   | B    | 409.9 | 6.9   | 12   | E    | 267.9 | 71.8 | 4    | B    | 126.1 | 15.0 |
| 28   | A    | 595.3  | 0.0   | 19   | E    | 400.7 | 13.0  | 11   | E    | 266.7 | 0.1  | 3    | E    | 116.7 | 3.7  |
| 27   | E    | 570.8  | 436.8 | 18   | A    | 404.9 | 0.0   | 10   | A    | 248.8 | 0.0  | 2    | A    | 94.9  | 0.0  |
| 26   | E    | 505.5  | 235.4 | 17   | A    | 386.6 | 0.0   | 9    | B    | 213.5 | 6.5  | 1    | B    | 89.2  | 1.5  |
| 25   | A    | 509.2  | 0.0   |      |      |       |       |      |      |       |      |      |      |       |      |

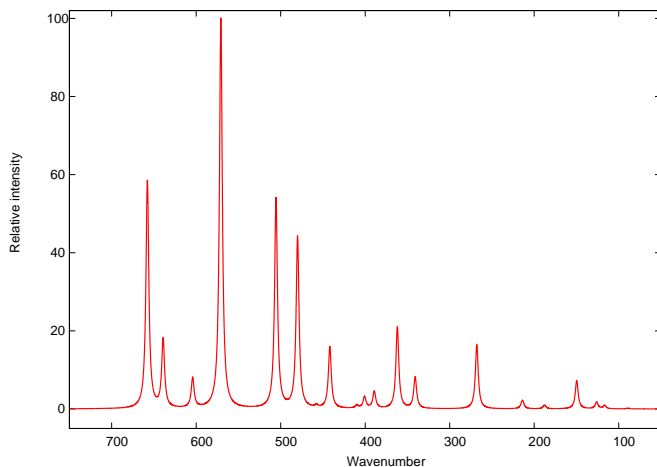

**Fig. 9** Simulated IR spectra of  $\text{Li}_8\text{F}_8$  at the VCI level.

**Table 10** Anharmonic frequencies in  $\text{cm}^{-1}$  and IR intensities in  $\text{km/mol}$  for  $\text{Li}_{10}\text{F}_{10}$  at the VCI level.

| Mode | Sym.  | Freq.  | Int.  | Mode | Sym.  | Freq. | Int.  | Mode | Sym.  | Freq. | Int.  | Mode | Sym.  | Freq. | Int. |
|------|-------|--------|-------|------|-------|-------|-------|------|-------|-------|-------|------|-------|-------|------|
| ZPVE | $A_g$ | 9808.9 |       | 41   | $A_g$ | 493.7 | 0.0   | 27   | $B_g$ | 370.7 | 0.0   | 13   | $A_g$ | 199.3 | 0.0  |
| 54   | $A_u$ | 665.6  | 635.8 | 40   | $B_g$ | 495.7 | 0.0   | 26   | $B_u$ | 357.2 | 136.3 | 12   | $A_u$ | 188.2 | 14.6 |
| 53   | $A_g$ | 654.3  | 0.0   | 39   | $A_u$ | 499.0 | 298.9 | 25   | $A_u$ | 344.5 | 52.7  | 11   | $B_u$ | 162.8 | 46.3 |
| 52   | $B_u$ | 656.3  | 143.5 | 38   | $B_u$ | 457.5 | 242.4 | 24   | $B_u$ | 340.2 | 98.2  | 10   | $B_g$ | 154.3 | 0.0  |
| 51   | $B_g$ | 642.2  | 0.0   | 37   | $A_g$ | 428.0 | 0.0   | 23   | $A_g$ | 316.4 | 0.0   | 9    | $A_g$ | 140.0 | 0.0  |
| 50   | $A_g$ | 610.5  | 0.0   | 36   | $B_g$ | 444.6 | 0.0   | 22   | $A_g$ | 276.6 | 0.0   | 8    | $B_g$ | 133.8 | 0.0  |
| 49   | $B_g$ | 610.0  | 0.0   | 35   | $A_u$ | 437.5 | 2.4   | 21   | $A_u$ | 274.8 | 1.4   | 7    | $B_g$ | 111.5 | 0.0  |
| 48   | $A_u$ | 608.1  | 99.2  | 34   | $A_g$ | 416.1 | 0.0   | 20   | $B_g$ | 268.6 | 0.0   | 6    | $B_u$ | 109.5 | 35.3 |
| 47   | $B_u$ | 604.7  | 576.9 | 33   | $A_u$ | 417.3 | 7.2   | 19   | $B_u$ | 255.4 | 147.0 | 5    | $A_u$ | 95.8  | 17.1 |
| 46   | $A_u$ | 603.4  | 1.5   | 32   | $B_u$ | 415.2 | 35.4  | 18   | $A_g$ | 246.5 | 0.0   | 4    | $B_u$ | 95.2  | 7.5  |
| 45   | $B_g$ | 564.6  | 0.0   | 31   | $B_g$ | 405.3 | 0.0   | 17   | $A_g$ | 237.8 | 0.0   | 3    | $A_g$ | 87.4  | 0.0  |
| 44   | $B_u$ | 546.6  | 774.1 | 30   | $A_g$ | 398.3 | 0.0   | 16   | $B_u$ | 237.0 | 89.5  | 2    | $A_g$ | 69.9  | 0.0  |
| 43   | $A_g$ | 523.0  | 0.0   | 29   | $A_g$ | 379.0 | 0.0   | 15   | $B_g$ | 225.3 | 0.0   | 1    | $A_g$ | 62.1  | 0.0  |
| 42   | $B_u$ | 510.6  | 248.4 | 28   | $A_u$ | 384.8 | 2.2   | 14   | $B_u$ | 204.0 | 60.1  |      |       |       |      |

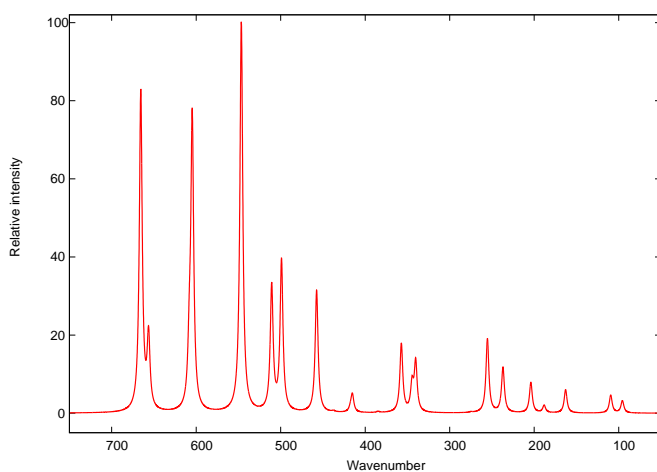

**Fig. 10** Simulated IR spectra of  $\text{Li}_{10}\text{F}_{10}$  at the VCI level.

**Table 11** Equilibrium and vibrationally averaged geometry of  $\text{Li}_2\text{F}_2$  at the DF-LCCSD(T)-F12a/cc-pVTZ-F12 level or VCI level in Å

| Equilibrium structure |             |               |               | Vibrationally averaged structure |             |               |               |
|-----------------------|-------------|---------------|---------------|----------------------------------|-------------|---------------|---------------|
| Atom                  | X           | Y             | Z             | Atom                             | X           | Y             | Z             |
| Li                    | 0.000000000 | 1.1155555473  | 0.000000000   | Li                               | 0.000000000 | 1.1246487746  | 0.000000000   |
| F                     | 0.000000000 | 0.000000000   | -1.3274795329 | F                                | 0.000000000 | 0.000000000   | -1.3347292166 |
| Li                    | 0.000000000 | -1.1155555473 | 0.000000000   | Li                               | 0.000000000 | -1.1246487751 | 0.000000000   |
| F                     | 0.000000000 | 0.000000000   | 1.3274795329  | F                                | 0.000000000 | 0.000000000   | 1.3347292166  |

**Table 12** Equilibrium and vibrationally averaged geometry of  $\text{Li}_3\text{F}_3$  at the DF-LCCSD(T)-F12a/cc-pVTZ-F12 level or VCI level in Å

| Equilibrium structure |             |               |               | Vibrationally averaged structure |             |               |               |
|-----------------------|-------------|---------------|---------------|----------------------------------|-------------|---------------|---------------|
| Atom                  | X           | Y             | Z             | Atom                             | X           | Y             | Z             |
| Li                    | 0.000000000 | 0.000000000   | -1.6334717677 | Li                               | 0.000000000 | 0.0000000005  | -1.6392427313 |
| F                     | 0.000000000 | 1.5497718716  | -0.8947627753 | F                                | 0.000000000 | 1.5558844486  | -0.8982783096 |
| Li                    | 0.000000000 | 1.4146324067  | 0.8167459238  | Li                               | 0.000000000 | 1.4199002688  | 0.8197164463  |
| F                     | 0.000000000 | 0.000000000   | 1.7895181352  | F                                | 0.000000000 | 0.0000000016  | 1.7964863964  |
| Li                    | 0.000000000 | -1.4146324067 | 0.8167459238  | Li                               | 0.000000000 | -1.4199002683 | 0.8197164463  |
| F                     | 0.000000000 | -1.5497718716 | -0.8947627753 | F                                | 0.000000000 | -1.5558844502 | -0.8982783123 |

**Table 13** Equilibrium and vibrationally averaged geometry of  $\text{Li}_4\text{F}_4(\text{a})$  at the DF-LCCSD(T)-F12a/cc-pVTZ-F12 level or VCI level in Å

| Equilibrium structure |               |               |               | Vibrationally averaged structure |               |               |               |
|-----------------------|---------------|---------------|---------------|----------------------------------|---------------|---------------|---------------|
| Atom                  | X             | Y             | Z             | Atom                             | X             | Y             | Z             |
| Li                    | 0.8618462130  | 0.8618462130  | 0.8618462130  | Li                               | 0.8697077940  | 0.8697418148  | 0.8697135483  |
| F                     | 0.9641675198  | -0.9641675198 | 0.9641675198  | F                                | 0.9712904566  | -0.9713238281 | 0.9712898449  |
| Li                    | -0.8618462130 | -0.8618462130 | 0.8618462130  | Li                               | -0.8697060773 | -0.8697436648 | 0.8697131852  |
| F                     | -0.9641675198 | 0.9641675198  | 0.9641675198  | F                                | -0.9712910149 | 0.9713244779  | 0.9712902650  |
| Li                    | -0.8618462130 | 0.8618462130  | -0.8618462130 | Li                               | -0.8697069833 | 0.8697422545  | -0.8697141002 |
| F                     | -0.9641675198 | -0.9641675198 | -0.9641675198 | F                                | -0.9712907677 | -0.9713240011 | -0.9712900004 |
| Li                    | 0.8618462130  | -0.8618462130 | -0.8618462130 | Li                               | 0.8697067997  | -0.8697431361 | -0.8697126672 |
| F                     | 0.9641675198  | 0.9641675198  | -0.9641675198 | F                                | 0.9712907598  | 0.9713243604  | -0.9712900967 |

**Table 14** Equilibrium and vibrationally averaged geometry of  $\text{Li}_4\text{F}_4(\text{b})$  at the DF-LCCSD(T)-F12a/cc-pVTZ-F12 level or VCI level in Å

| Equilibrium structure |               |               |             | Vibrationally averaged structure |               |               |             |
|-----------------------|---------------|---------------|-------------|----------------------------------|---------------|---------------|-------------|
| Atom                  | X             | Y             | Z           | Atom                             | X             | Y             | Z           |
| Li                    | 0.000000000   | 2.1662763410  | 0.000000000 | Li                               | 0.0000000016  | 2.1705109036  | 0.000000000 |
| F                     | 1.6222250758  | 1.6222250758  | 0.000000000 | F                                | 1.6256864563  | 1.6256935843  | 0.000000000 |
| Li                    | 2.1662763410  | 0.000000000   | 0.000000000 | Li                               | 2.1704623770  | -0.0000000026 | 0.000000000 |
| F                     | 1.6222250758  | -1.6222250758 | 0.000000000 | F                                | 1.6256864584  | -1.6256935886 | 0.000000000 |
| Li                    | 0.000000000   | -2.1662763410 | 0.000000000 | Li                               | 0.0000000048  | -2.1705108999 | 0.000000000 |
| F                     | -1.6222250758 | -1.6222250758 | 0.000000000 | F                                | -1.6256864537 | -1.6256935954 | 0.000000000 |
| Li                    | -2.1662763410 | 0.000000000   | 0.000000000 | Li                               | -2.1704623860 | 0.000000000   | 0.000000000 |
| F                     | -1.6222250758 | 1.6222250758  | 0.000000000 | F                                | -1.6256864600 | 1.6256935992  | 0.000000000 |

**Table 15** Equilibrium and vibrationally averaged geometry of  $\text{Li}_4\text{F}_4(\text{c})$  at the DF-LCCSD(T)-F12a/cc-pVTZ-F12 level or VCI level in Å

| Equilibrium structure |               |               |             | Vibrationally averaged structure |               |               |             |
|-----------------------|---------------|---------------|-------------|----------------------------------|---------------|---------------|-------------|
| Atom                  | X             | Y             | Z           | Atom                             | X             | Y             | Z           |
| Li                    | 1.1102112638  | 2.4435637681  | 0.000000000 | Li                               | 1.1115679236  | 2.4398671227  | 0.000000000 |
| F                     | -0.5584592313 | 2.7685660175  | 0.000000000 | F                                | -0.5624843914 | 2.7705294592  | 0.000000000 |
| Li                    | -0.7903974432 | 1.0242634311  | 0.000000000 | Li                               | -0.8191120969 | 1.0298844153  | 0.000000000 |
| F                     | 1.1970384815  | 0.7044507578  | 0.000000000 | F                                | 1.2188171575  | 0.7035745217  | 0.000000000 |
| Li                    | 0.7903974432  | -1.0242634311 | 0.000000000 | Li                               | 0.8175660760  | -1.0282101161 | 0.000000000 |
| F                     | -1.1970384815 | -0.7044507578 | 0.000000000 | F                                | -1.2181014199 | -0.7017486481 | 0.000000000 |
| Li                    | -1.1102112638 | -2.4435637681 | 0.000000000 | Li                               | -1.1129803933 | -2.4448961012 | 0.000000000 |
| F                     | 0.5584592313  | -2.7685660175 | 0.000000000 | F                                | 0.5628612079  | -2.7711164697 | 0.000000000 |

**Table 16** Equilibrium and vibrationally averaged geometry of Li<sub>4</sub>F<sub>4</sub>(d) at the DF-LCCSD(T)-F12a/cc-pVTZ-F12 level or VCI level in Å

| Equilibrium structure |               |               |               | Vibrationally averaged structure |               |               |               |
|-----------------------|---------------|---------------|---------------|----------------------------------|---------------|---------------|---------------|
| Atom                  | X             | Y             | Z             | Atom                             | X             | Y             | Z             |
| Li                    | 1.0153577444  | 0.0000000000  | -1.1671249056 | Li                               | 1.0271001309  | -0.0000000111 | -1.1976531299 |
| Li                    | -1.0153577444 | 0.0000000000  | -1.1671249056 | Li                               | -1.0271001315 | 0.0000000085  | -1.1976531357 |
| F                     | 0.0000000000  | 0.0000000000  | -2.5744387008 | F                                | 0.0000000053  | 0.0000000000  | -2.5963323809 |
| F                     | 0.0000000000  | -1.3017798939 | -0.1613199738 | F                                | -0.0000000048 | -1.3215035938 | -0.1526258494 |
| F                     | 0.0000000000  | 1.3017798939  | -0.1613199738 | F                                | -0.0000000058 | 1.3215035949  | -0.1526258494 |
| Li                    | 0.0000000000  | -1.3510584341 | 1.5557003104  | Li                               | 0.0000000053  | -1.3540043896 | 1.5681634416  |
| Li                    | 0.0000000000  | 1.3510584341  | 1.5557003104  | Li                               | -0.0000000064 | 1.3540043901  | 1.5681634416  |
| F                     | 0.0000000000  | 0.0000000000  | 2.6100813181  | F                                | 0.0000000053  | 0.0000000000  | 2.6279294224  |

**Table 17** Equilibrium and vibrationally averaged geometry of Li<sub>4</sub>F<sub>4</sub>(e) at the DF-LCCSD(T)-F12a/cc-pVTZ-F12 level or VCI level in Å

| Equilibrium structure |               |               |               | Vibrationally averaged structure |               |               |               |
|-----------------------|---------------|---------------|---------------|----------------------------------|---------------|---------------|---------------|
| Atom                  | X             | Y             | Z             | Atom                             | X             | Y             | Z             |
| F                     | -1.2201750000 | 0.0000000000  | 1.2506941814  | F                                | -1.2292193770 | -0.0000000011 | 1.2658076137  |
| F                     | 1.2201750000  | 0.0000000000  | 1.2506941814  | F                                | 1.2292193754  | 0.0000000011  | 1.2658076105  |
| Li                    | 0.0000000000  | 0.0000000000  | 2.4781371814  | Li                               | 0.0000000011  | 0.0000000005  | 2.4927012527  |
| Li                    | 0.0000000000  | 1.1627590000  | 0.2839061815  | Li                               | 0.0000000000  | 1.1741983630  | 0.2775922015  |
| Li                    | 0.0000000000  | -1.1627590000 | 0.2839061815  | Li                               | -0.0000000016 | -1.1741983635 | 0.2775922015  |
| F                     | 0.0000000000  | 1.4973030000  | -1.4009208186 | F                                | 0.0000000011  | 1.5009027651  | -1.4132586646 |
| F                     | 0.0000000000  | -1.4973030000 | -1.4009208186 | F                                | 0.0000000000  | -1.5009027651 | -1.4132586652 |
| Li                    | 0.0000000000  | 0.0000000000  | -2.2323618185 | Li                               | 0.0000000011  | 0.0000000000  | -2.2493297591 |

**Table 18** Equilibrium and vibrationally averaged geometry of Li<sub>5</sub>F<sub>5</sub> at the DF-LCCSD(T)-F12a/cc-pVTZ-F12 level or VCI level in Å

| Equilibrium structure |               |               |               | Vibrationally averaged structure |               |               |               |
|-----------------------|---------------|---------------|---------------|----------------------------------|---------------|---------------|---------------|
| Atom                  | X             | Y             | Z             | Atom                             | X             | Y             | Z             |
| Li                    | 0.0000000000  | 0.0000000000  | -2.8660542289 | Li                               | 0.0000000000  | 0.0000000011  | -2.8831880395 |
| F                     | 1.5176870000  | 0.0000000000  | -2.0685602290 | F                                | 1.5218087268  | 0.0000000037  | -2.0831838157 |
| F                     | -1.5176870000 | 0.0000000000  | -2.0685602290 | F                                | -1.5218087268 | -0.0000000026 | -2.0831838146 |
| Li                    | 1.1546110000  | 0.0000000000  | -0.3791552289 | Li                               | 1.1637341467  | -0.0000000016 | -0.3873374056 |
| Li                    | -1.1546110000 | 0.0000000000  | -0.3791552289 | Li                               | -1.1637341467 | 0.0000000005  | -0.3873374051 |
| F                     | 0.0000000000  | -1.2934230000 | 0.3913017710  | F                                | -0.0000000016 | -1.3017409148 | 0.3986003614  |
| F                     | 0.0000000000  | 1.2934230000  | 0.3913017710  | F                                | 0.0000000021  | 1.3017409137  | 0.3986003604  |
| Li                    | 0.0000000000  | 1.3821660000  | 2.1164087710  | Li                               | 0.0000000037  | 1.3849422133  | 2.1291343074  |
| Li                    | 0.0000000000  | -1.3821660000 | 2.1164087710  | Li                               | -0.0000000037 | -1.3849422128 | 2.1291343079  |
| F                     | 0.0000000000  | 0.0000000000  | 3.1298187711  | F                                | -0.0000000005 | 0.0000000005  | 3.1474405080  |

**Table 19** Equilibrium and vibrationally averaged geometry of Li<sub>6</sub>F<sub>6</sub> at the DF-LCCSD(T)-F12a/cc-pVTZ-F12 level or VCI level in Å

| Equilibrium structure |               |               |               | Vibrationally averaged structure |               |               |               |
|-----------------------|---------------|---------------|---------------|----------------------------------|---------------|---------------|---------------|
| Atom                  | X             | Y             | Z             | Atom                             | X             | Y             | Z             |
| Li                    | 0.8673616608  | 1.7491637713  | 0.0000000000  | Li                               | 0.8771785241  | 1.7598497775  | 0.0000000360  |
| F                     | 1.0020896191  | 0.9166428663  | 1.5876580904  | F                                | 1.0098957252  | 0.9222412984  | 1.5973196056  |
| Li                    | 0.8673722012  | -0.8745782656 | 1.5148191808  | Li                               | 0.8776181598  | -0.8798084650 | 1.5241170353  |
| F                     | 1.0021025489  | -1.8332575984 | 0.0000000000  | F                                | 1.0096826774  | -1.8443892769 | -0.0000000064 |
| Li                    | 0.8673722012  | -0.8745782656 | -1.5148191808 | Li                               | 0.8776183953  | -0.8798084550 | -1.5241169914 |
| F                     | 1.0020896191  | 0.9166428663  | -1.5876580904 | F                                | 1.0098956686  | 0.9222413042  | -1.5973196421 |
| F                     | -1.0021025489 | 1.8332575984  | 0.0000000000  | F                                | -1.0096826669 | 1.8443892139  | -0.0000000085 |
| Li                    | -0.8673722012 | 0.8745782656  | 1.5148191808  | Li                               | -0.8776181244 | 0.8798082698  | 1.5241167951  |
| F                     | -1.0020896191 | -0.9166428663 | 1.5876580904  | F                                | -1.0098957332 | -0.9222412952 | 1.5973195014  |
| Li                    | -0.8673616608 | -1.7491637713 | 0.0000000000  | Li                               | -0.8771786554 | -1.7598493055 | -0.0000000471 |
| F                     | -1.0020896191 | -0.9166428663 | -1.5876580904 | F                                | -1.0098958020 | -0.9222412634 | -1.5973194575 |
| Li                    | -0.8673722012 | 0.8745782656  | -1.5148191808 | Li                               | -0.8776179465 | 0.8798082280  | -1.5241168078 |



**Table 20** Equilibrium and vibrationally averaged geometry of Li<sub>7</sub>F<sub>7</sub> at the DF-LCCSD(T)-F12a/cc-pVTZ-F12 level or VCI level in Å

| Equilibrium structure |               |               |               | Vibrationally averaged structure |               |               |               |
|-----------------------|---------------|---------------|---------------|----------------------------------|---------------|---------------|---------------|
| Atom                  | X             | Y             | Z             | Atom                             | X             | Y             | Z             |
| Li                    | 0.9219672655  | -1.3202210397 | 1.4646291862  | Li                               | 0.9336897832  | -1.3279647581 | 1.4721586037  |
| F                     | 1.1467215016  | -2.3396317845 | 0.0000000000  | F                                | 1.1578469555  | -2.3553379810 | 0.0000000042  |
| Li                    | 0.9219672655  | -1.3202210397 | -1.4646291862 | Li                               | 0.9336897880  | -1.3279647533 | -1.4721585958 |
| F                     | 0.8889663402  | 0.4715496744  | -1.4498002925 | F                                | 0.8954182576  | 0.4730356294  | -1.4585660230 |
| Li                    | 1.3086106944  | 1.5294788858  | 0.0000000000  | Li                               | 1.3197542610  | 1.5411232864  | -0.0000000016 |
| F                     | 0.8889663402  | 0.4715496744  | 1.4498002925  | F                                | 0.8954182560  | 0.4730356252  | 1.4585660187  |
| Li                    | -0.9269744863 | 0.2688185995  | 1.3811618221  | Li                               | -0.9344238658 | 0.2678435381  | 1.3890880834  |
| F                     | -0.9360613999 | -1.5182449929 | 1.5413561238  | F                                | -0.9408005607 | -1.5286394049 | 1.5485263623  |
| Li                    | -0.7221670274 | -2.4136783125 | 0.0000000000  | Li                               | -0.7277844266 | -2.4329264334 | -0.0000000032 |
| F                     | -0.9360613999 | -1.5182449929 | -1.5413561238 | F                                | -0.9408005565 | -1.5286394002 | -1.5485263665 |
| Li                    | -0.9269744863 | 0.2688185995  | -1.3811618221 | Li                               | -0.9344238653 | 0.2678435428  | -1.3890880754 |
| F                     | -1.6122132082 | 1.2762074763  | 0.0000000000  | F                                | -1.6201420725 | 1.2871112578  | 0.0000000058  |
| Li                    | -0.9652771683 | 2.9207519186  | 0.0000000000  | Li                               | -0.9638723208 | 2.9363458788  | 0.0000000026  |
| F                     | 0.6861257673  | 3.1891953224  | 0.0000000000  | F                                | 0.6909433554  | 3.2073897366  | -0.0000000069 |

**Table 21** Equilibrium and vibrationally averaged geometry of Li<sub>8</sub>F<sub>8</sub> at the DF-LCCSD(T)-F12a/cc-pVTZ-F12 level or VCI level in Å

| Equilibrium structure |               |               |               | Vibrationally averaged structure |               |               |               |
|-----------------------|---------------|---------------|---------------|----------------------------------|---------------|---------------|---------------|
| Atom                  | X             | Y             | Z             | Atom                             | X             | Y             | Z             |
| Li                    | 0.9581349529  | 1.5820410299  | -0.7478321358 | Li                               | 0.9589107188  | 1.5946626339  | -0.7541983239 |
| F                     | -0.0003277843 | 1.9357855642  | 0.7148909752  | F                                | 0.0017261734  | 1.9459475052  | 0.7210962765  |
| F                     | 1.9357859795  | 0.0003278490  | -0.7148911139 | F                                | 1.9459843635  | -0.0017041289 | -0.7210642978 |
| Li                    | 0.3038702236  | 1.1739699821  | 2.3214154579  | Li                               | 0.3088145601  | 1.1836685104  | 2.3391099522  |
| Li                    | 1.5820410427  | -0.9581346202 | 0.7478320834  | Li                               | 1.5946832173  | -0.9589149914 | 0.7541788592  |
| F                     | 1.3237027452  | -0.3005157561 | 2.4144220435  | F                                | 1.3325613242  | -0.3017519267 | 2.4325351259  |
| F                     | -1.9357859795 | -0.0003278490 | -0.7148911139 | F                                | -1.9459843794 | 0.0017041745  | -0.7210643386 |
| Li                    | -1.5820410427 | 0.9581346202  | 0.7478320834  | Li                               | -1.5946832596 | 0.9589150591  | 0.7541788624  |
| Li                    | -0.9581349529 | -1.5820410299 | -0.7478321358 | Li                               | -0.9589108458 | -1.5946628053 | -0.7541983451 |
| F                     | -1.3237027452 | 0.3005157561  | 2.4144220435  | F                                | -1.3325613427 | 0.3017519140  | 2.4325351296  |
| F                     | 0.0003277843  | -1.9357855642 | 0.7148909752  | F                                | -0.0017260872 | -1.9459474745 | 0.7210962765  |
| Li                    | -0.3038702236 | -1.1739699821 | 2.3214154579  | Li                               | -0.3088145305 | -1.1836685554 | 2.3391100581  |
| Li                    | 1.1739699781  | -0.3038704338 | -2.3214153485 | Li                               | 1.1836665021  | -0.3088484259 | -2.3391158340 |
| F                     | 0.3005157839  | 1.3237027280  | -2.4144219260 | F                                | 0.3017750924  | 1.3325292513  | -2.4325577265 |
| Li                    | -1.1739699781 | 0.3038704338  | -2.3214153485 | Li                               | -1.1836664736 | 0.3088484137  | -2.3391158409 |
| F                     | -0.3005157839 | -1.3237027280 | -2.4144219260 | F                                | -0.3017751030 | -1.3325292555 | -2.4325577546 |

**Table 22** Equilibrium and vibrationally averaged geometry of Li<sub>10</sub>F<sub>10</sub> at the DF-LCCSD(T)-F12a/cc-pVTZ-F12 level or VCI level in Å

| Equilibrium structure |               |               |               | Vibrationally averaged structure |               |               |               |
|-----------------------|---------------|---------------|---------------|----------------------------------|---------------|---------------|---------------|
| Atom                  | X             | Y             | Z             | Atom                             | X             | Y             | Z             |
| Li                    | -1.6096229893 | 0.6989944790  | -1.5708503267 | Li                               | -1.6156126495 | 0.6895523866  | -1.5841430048 |
| F                     | -1.3527934375 | 0.1364724801  | -3.2703281041 | F                                | -1.3607340134 | 0.1364859752  | -3.2965537976 |
| Li                    | -0.1627728357 | -1.2059717098 | -3.1942541120 | Li                               | -0.1638589041 | -1.2133409883 | -3.2203179936 |
| F                     | 1.3527934566  | -0.1364723122 | -3.2703281062 | F                                | 1.3607340832  | -0.1364857784 | -3.2965537643 |
| Li                    | 0.1627728423  | 1.2059718750  | -3.1942540074 | Li                               | 0.1638589862  | 1.2133411937  | -3.2203179645 |
| F                     | -0.1810489144 | 1.8694112149  | -1.5624003017 | F                                | -0.1764586008 | 1.8684380680  | -1.5752032644 |
| Li                    | 1.6096230309  | -0.6989945609 | -1.5708504065 | Li                               | 1.6156126966  | -0.6895523581 | -1.5841430630 |
| F                     | 1.7850406329  | 0.1594686448  | -0.0000000523 | F                                | 1.7935613366  | 0.1589772846  | 0.0000000582  |
| Li                    | 1.6096228787  | -0.6989943560 | 1.5708504073  | Li                               | 1.6156130083  | -0.6895528729 | 1.5841429286  |
| F                     | 0.1810488305  | -1.8694110876 | 1.5624003101  | F                                | 0.1764589040  | -1.8684385823 | 1.5752035591  |
| Li                    | -0.6701130691 | -1.6334514130 | -0.0000000755 | Li                               | -0.6682907126 | -1.6398321151 | 0.0000002963  |
| F                     | 0.1810488626  | -1.8694111634 | -1.5624004398 | F                                | 0.1764585061  | -1.8684378489 | -1.5752031935 |
| F                     | -1.7850406426 | -0.1594687861 | -0.0000000214 | F                                | -1.7935613620 | -0.1589773984 | 0.0000000751  |
| Li                    | -1.6096229079 | 0.6989943548  | 1.5708503592  | Li                               | -1.6156129368 | 0.6895525438  | 1.5841430090  |
| F                     | -0.1810488143 | 1.8694110582  | 1.5624003276  | F                                | -0.1764589331 | 1.8684382765  | 1.5752034173  |
| Li                    | 0.6701131450  | 1.6334513541  | -0.0000000267 | Li                               | 0.6682908174  | 1.6398320696  | 0.0000002413  |
| Li                    | -0.1627728150 | -1.2059718212 | 3.1942540774  | Li                               | -0.1638587946 | -1.2133410227 | 3.2203178354  |
| F                     | -1.3527934459 | 0.1364723397  | 3.2703281740  | F                                | -1.3607341991 | 0.1364858070  | 3.2965535256  |
| Li                    | 0.1627728071  | 1.2059717708  | 3.1942540746  | Li                               | 0.1638587808  | 1.2133410159  | 3.2203178502  |
| F                     | 1.3527934398  | -0.1364723784 | 3.2703282273  | F                                | 1.3607341705  | -0.1364857498 | 3.2965533341  |
